# Supplementary material for: DNA Cleavage and Condensation Activities of Mono- and Binuclear Hybrid Complexes and Regulation by Graphene Oxide
Source: MDPI journal article supplement (doi:10.3390/molecules21070920), 2016-07-15
Supplement: s1 [file s1]

# Supplementary Materials: DNA Cleavage and Condensation Activities of Mono- and Bi-Nuclear Hybrid Complexes and Regulation by Graphene Oxide

Shuo Li, Mingxing Dai, Chunping Zhang, Bingying Jiang, Junqiang Xu, Dewen Zhou and Zhongwei Gu

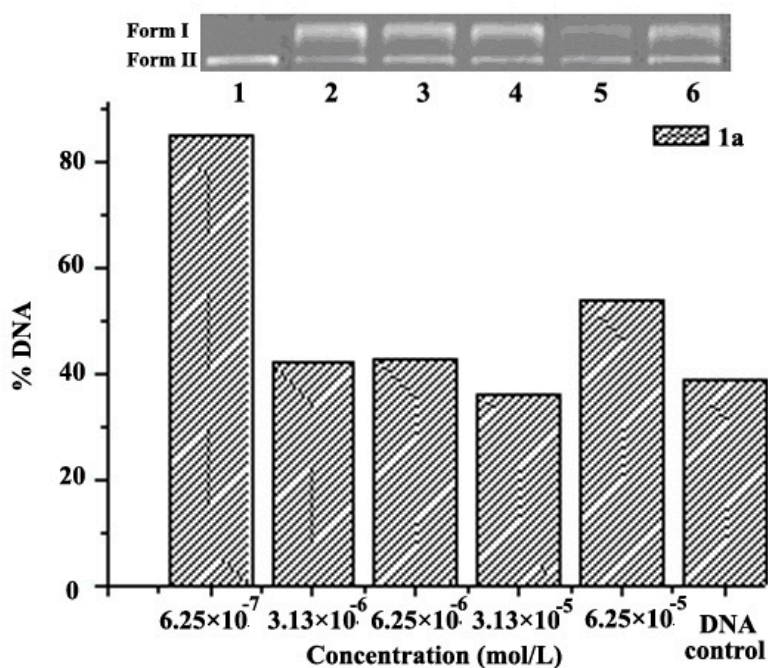

**Figure S1.** Histograms and electropherograms representing cleavage of pUC19 plasmid DNA ( $0.008 \mu\text{g}/\mu\text{L}$ ) by different concentrations of **1a** ( $\text{pH} = 8.0$ ) in buffer ( $5 \text{ mM Tris-HCl}/10 \text{ mM NaCl}$ ) at  $37^\circ\text{C}$  for 6 h. Complex **1a** and Lanes 1–5: complex **1a** and Lanes 1–5:  $6.25 \times 10^{-7}$ ,  $3.13 \times 10^{-6}$ ,  $6.25 \times 10^{-6}$ ,  $3.13 \times 10^{-5}$ ,  $6.25 \times 10^{-5} \text{ mol/L}$ , and Lane 6 was DNA control respectively.

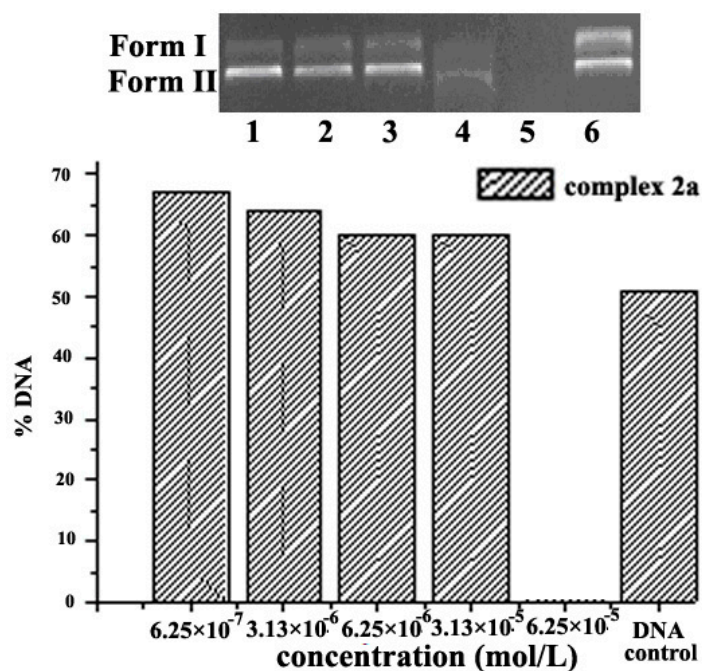

**Figure S2.** Histograms and electropherograms representing cleavage of pUC19 plasmid DNA ( $0.008 \mu\text{g}/\mu\text{L}$ ) by different concentrations of **2a** (pH = 7.4) in buffer (5 mM Tris-HCl/10 mM NaCl) at  $37^\circ\text{C}$  for 6 h. Complex **2a** and Lanes 1–5:  $6.25 \times 10^{-7}$ ,  $3.13 \times 10^{-6}$ ,  $6.25 \times 10^{-6}$ ,  $3.13 \times 10^{-5}$ ,  $6.25 \times 10^{-5}$  mol/L, and Lane 6 was DNA control respectively.

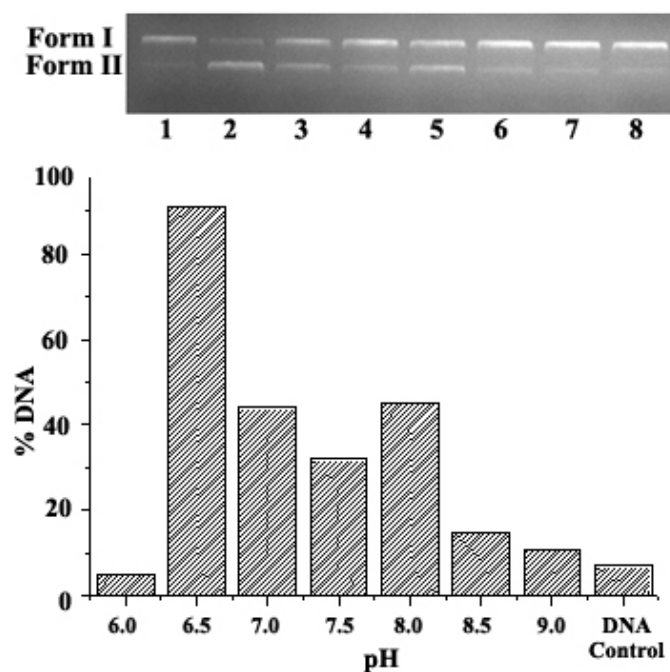

**Figure S3.** Histograms and electropherograms representing cleavage of pUC19 plasmid DNA ( $0.008 \mu\text{g}/\mu\text{L}$ ) in different pH buffer of **2c** ( $6.25 \times 10^{-7}$  mol/L) (5 mM Tris-HCl/10 mM NaCl) at  $37^\circ\text{C}$  for 6 h. Lanes 2–8: pH = 6.0, 6.5, 7.0, 7.5, 8.0, 8.5, 9.0, and Lane 1 was DNA control respectively.

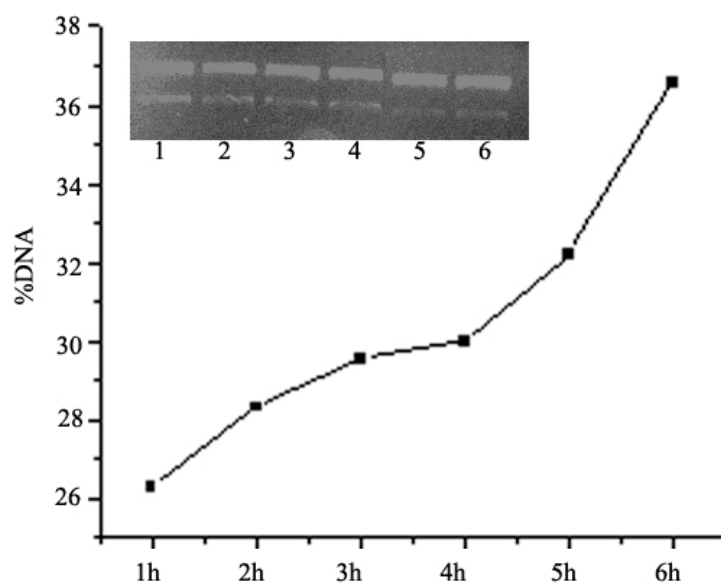

**Figure S4.** Time course of pUC19 DNA (0.008  $\mu\text{g}/\mu\text{L}$ ) cleavage promoted by **2b** ( $3.13 \times 10^{-7}$  mol/L) in pH = 7.4 buffers (5 mM Tris-HCl/10 mM NaCl) at 37 °C. Lanes 1–6, reaction time 6, 5, 4, 3, 2, 1 h, respectively.

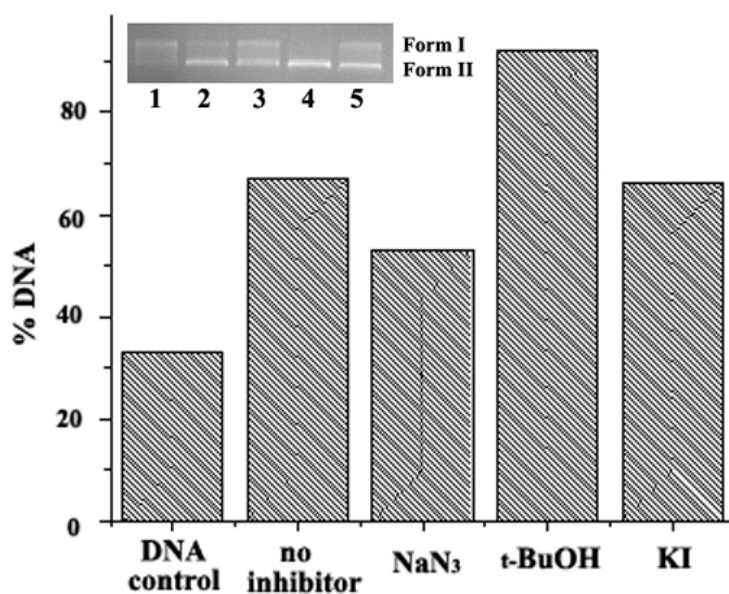

**Figure S5.** Histograms representing cleavage of pUC19 plasmid DNA (0.008  $\mu\text{g}/\mu\text{L}$ ) by compound **2b** typical radical scavengers ( $3.13 \times 10^{-7}$  mol/L, pH = 7.4). Lane 1: DNA control, Lane 2: no inhibitor, Lane 3: NaN<sub>3</sub>, Lane 4: t-BuOH, Lane 5: KI.

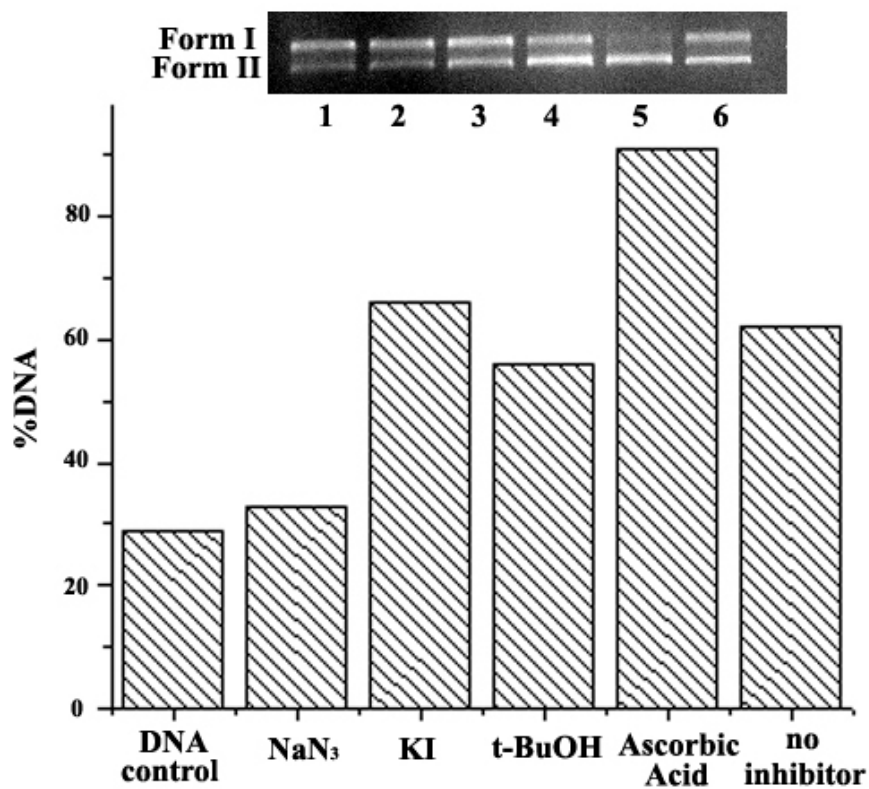

**Figure S6.** Histograms representing cleavage of pUC19 plasmid DNA (0.008  $\mu\text{g}/\mu\text{L}$ ) by compound **1c** typical radical scavengers ( $6.25 \times 10^{-7}$  mol/L, pH = 7.4), Lane 1: DNA control, Lane 2: NaN<sub>3</sub>, Lane 3: KI, Lane 4: *t*-BuOH, Lane 5: ascorbic, Lane 6: no inhibitor.
